# Supplementary material
Source: publisher figshare collection journal article supplement (https://tandf.figshare.com/ndownloader/files/30925171)

Fréchet

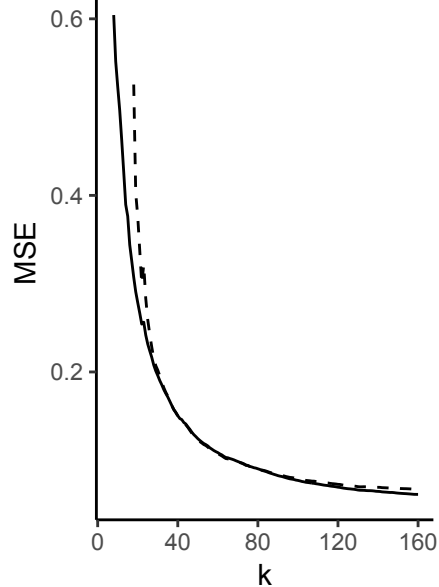

Pareto

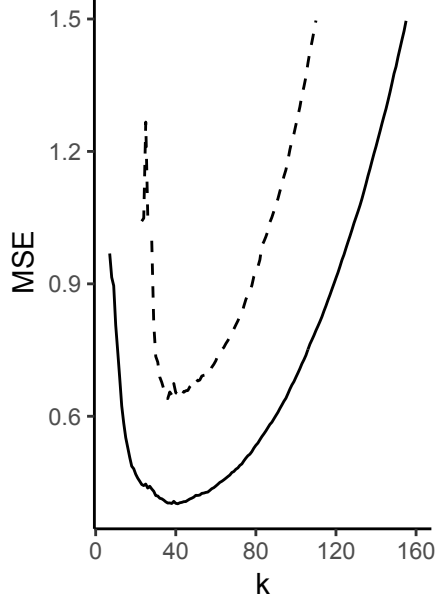

Student

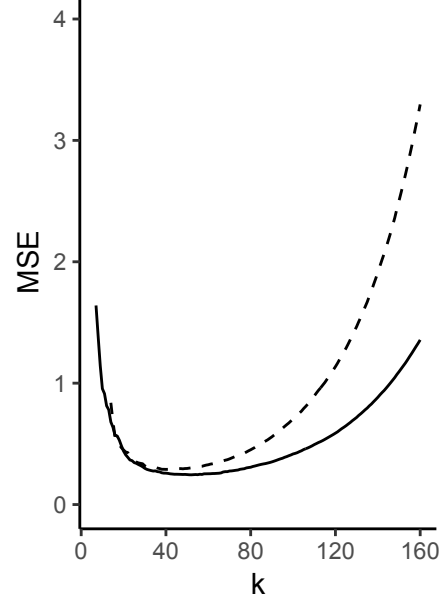

Fréchet

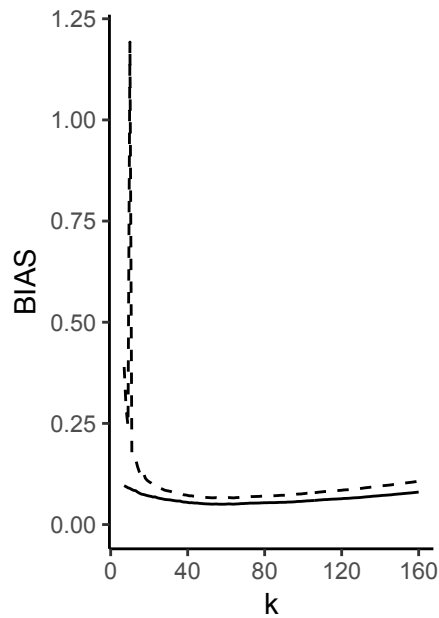

Pareto

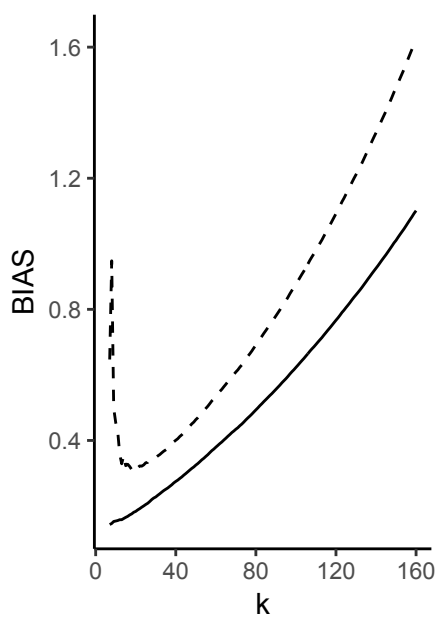

Student

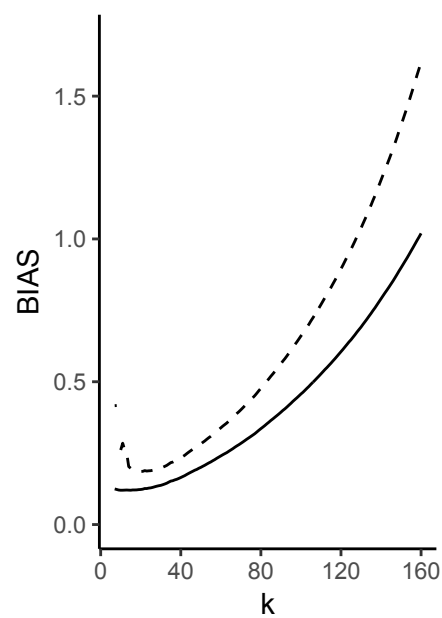

Supplement: Supplementary file 1 [file 30925171]

Fréchet

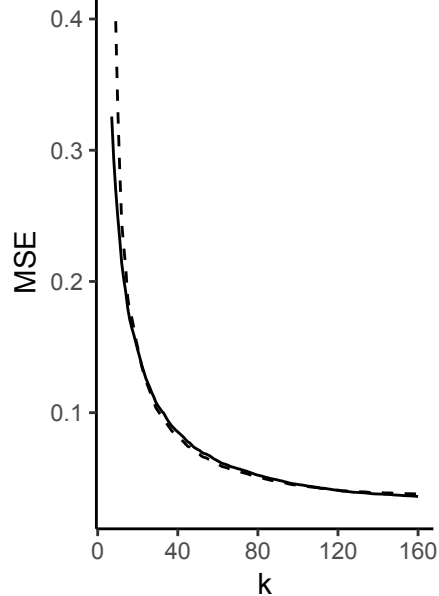

Pareto

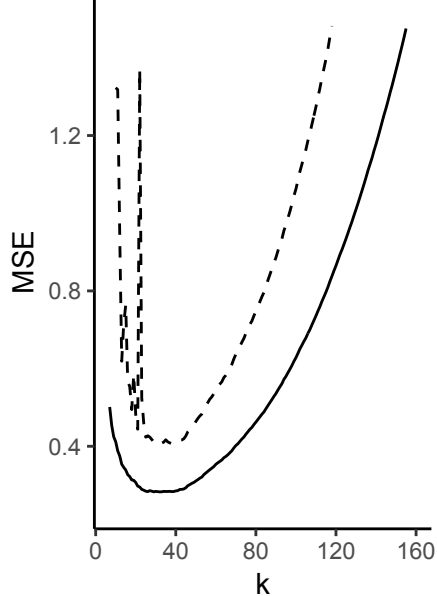

Student

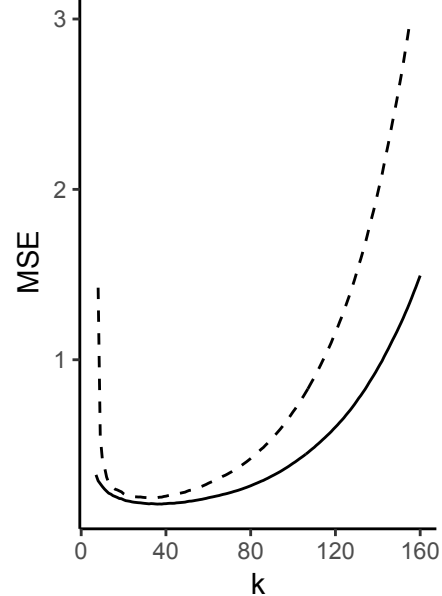

Fréchet

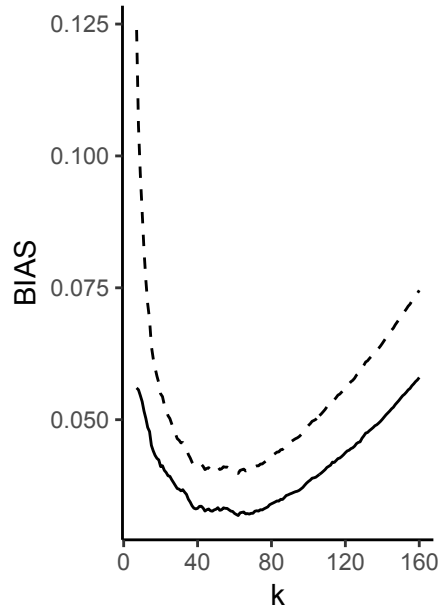

Pareto

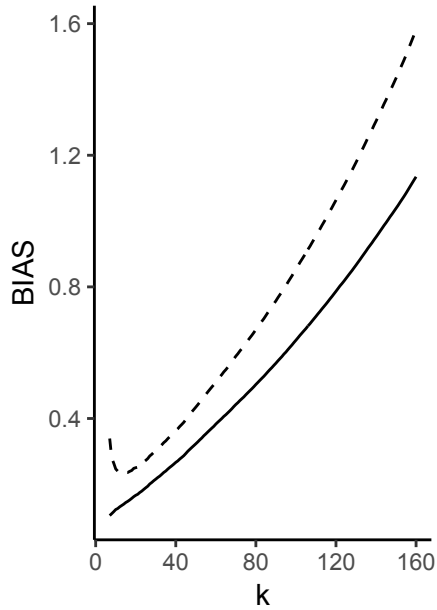

Student

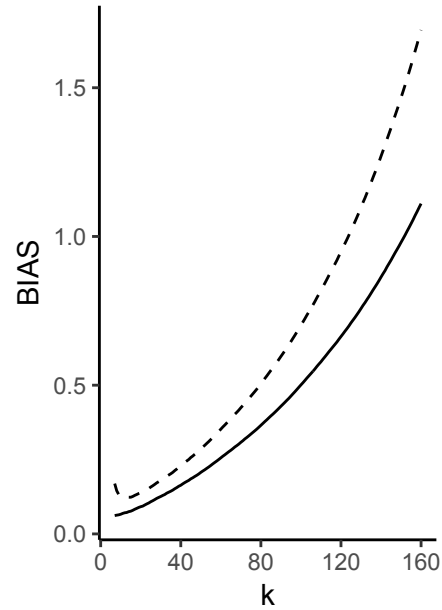

Supplement: Supplementary file 2 [file 30925171]

Fréchet

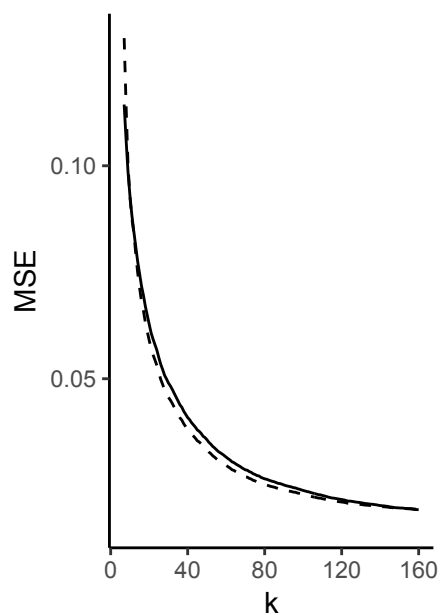

Pareto

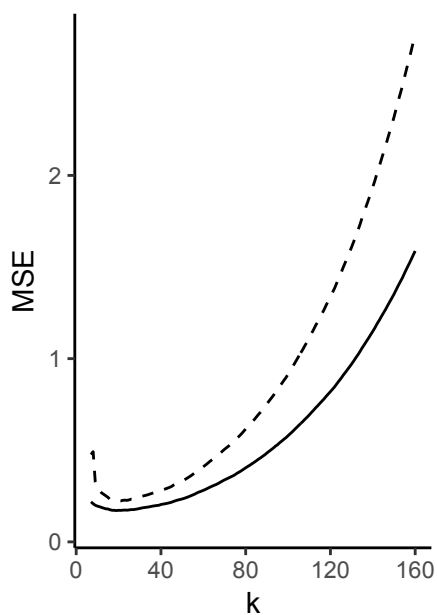

Student

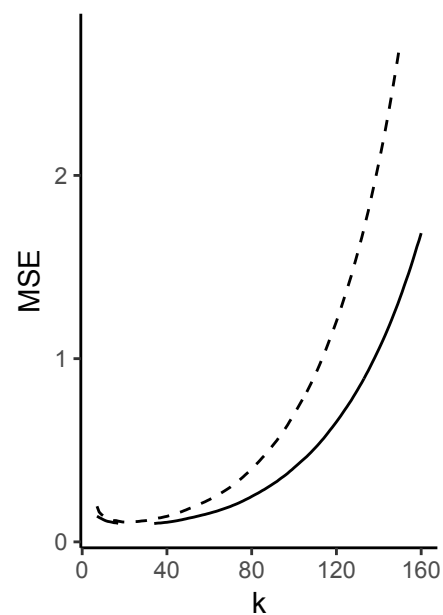

Fréchet

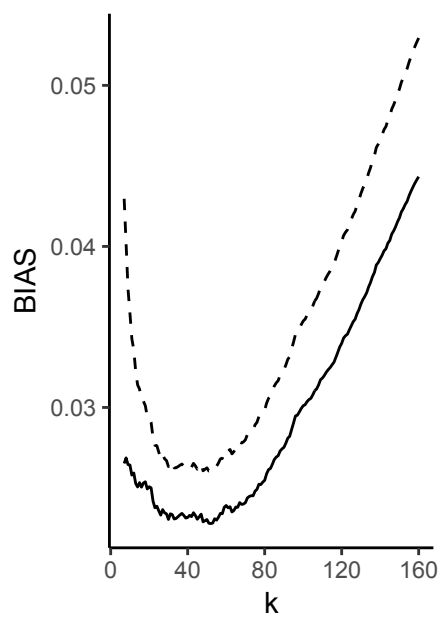

Pareto

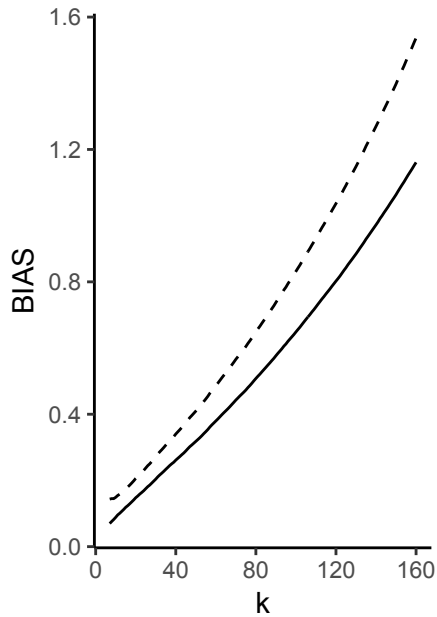

Student

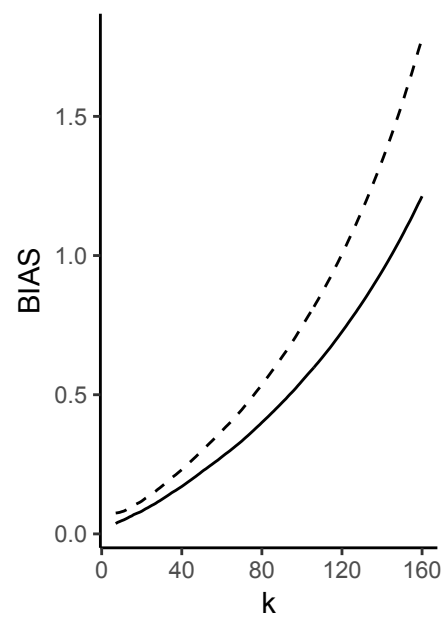

Supplement: Supplementary file 3 [file 30925171]
